# Supplementary material for: Low-work-function LaB6 for realizing photodynamic-enhanced photothermal therapy
Source: Royal Society of Chemistry journal article supplement (doi:10.1039/d1tb00544h), 2021-01-01
Supplement: d1tb00544h1.pdf [file d1tb00544h1.pdf]

Electronic Supplementary Information (ESI) for

## Low-work-function LaB<sub>6</sub> for realizing photodynamic-enhanced photothermal therapy

Shuanglong Tang, ‡<sup>a</sup> Weicheng Huang, ‡<sup>b</sup> Yan Gao, <sup>a</sup> Na An,<sup>a</sup> Yadong Wu,<sup>a</sup> Bin Yang, <sup>b</sup> Mei Yan <sup>\*a</sup> Jingyan Cao<sup>\*c</sup> and Chongshen Guo <sup>\*a</sup>

<sup>a</sup> School of Chemistry and Chemical Engineering, Harbin Institute of Technology, Harbin, 150001, China. E-mail: chongshenguo@hit.edu.cn; meiyang@hit.edu.cn.

<sup>b</sup> School of Instrumentation Science and Engineering, Harbin Institute of Technology, Harbin 150001, China

<sup>c</sup> Department of Medical Oncology, Harbin Medical University Cancer Hospital, Harbin 150001, China. E-mail: caojingyan@126.com

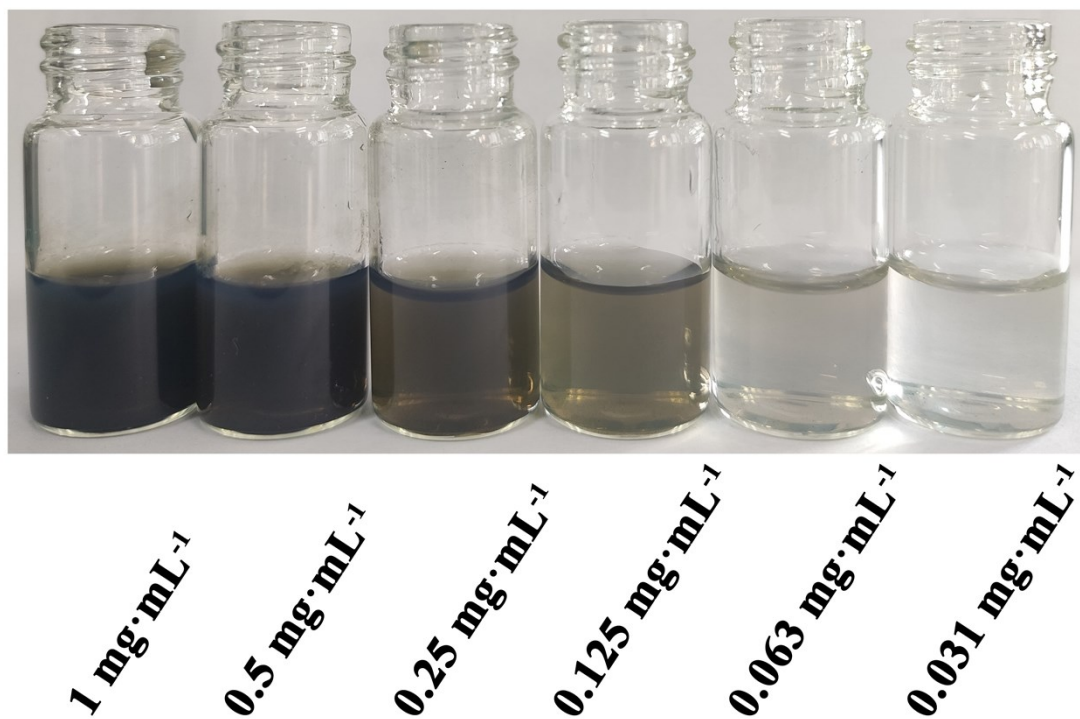

Fig. S1 Digital photo of different-concentration LaB<sub>6</sub> aqueous dispersions.

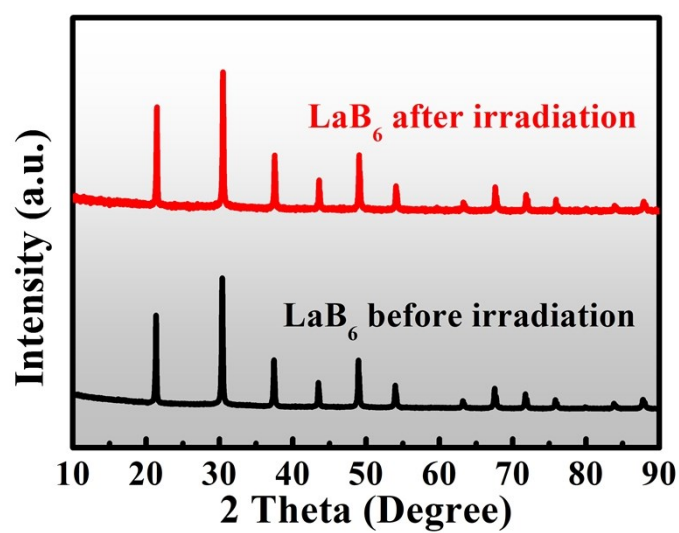

Fig. S2 XRD pattern of LaB<sub>6</sub> samples before and after NIR irradiation (3.64 W·cm<sup>-2</sup>).

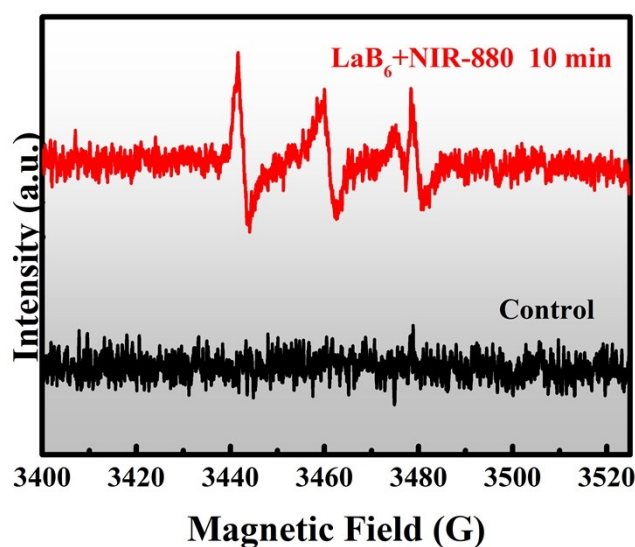

**Fig. S3** ESR spectra of TEMP in the present of  $\text{LaB}_6$  for  $^1\text{O}_2$  detection.

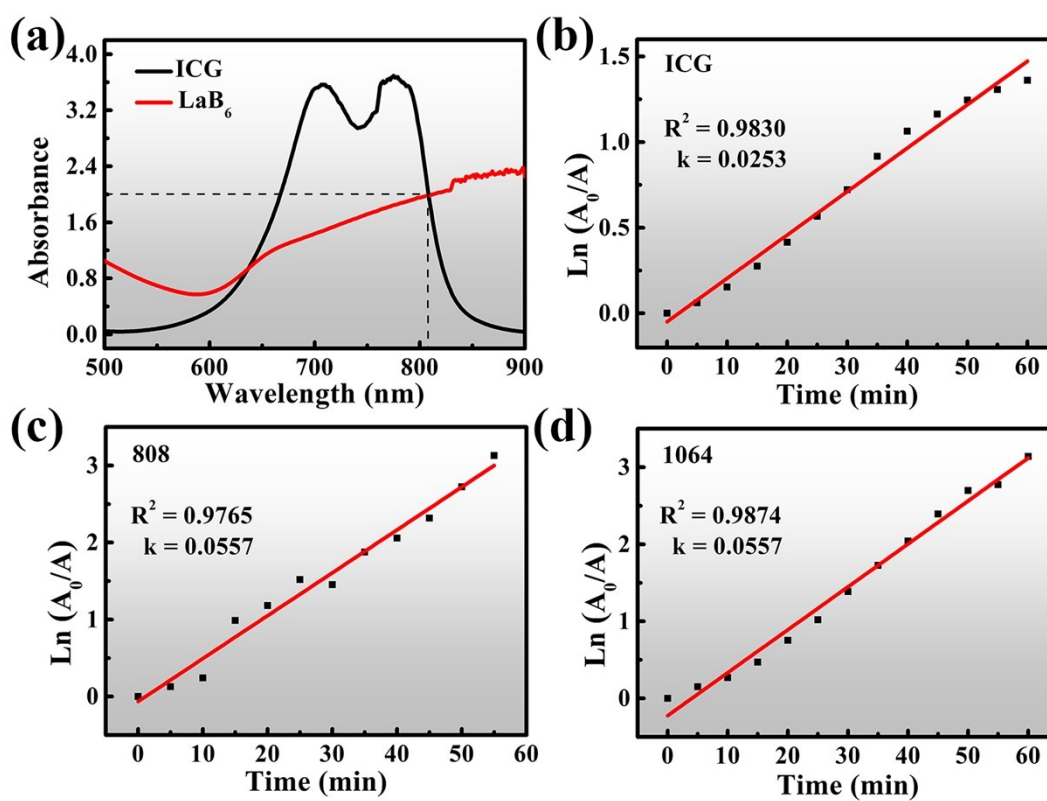

**Fig. S4** (a) Light absorption of ICG solution and  $\text{LaB}_6$  dispersion, (b)-(d) the rate constants for DPBF decomposition by ICG at 808 nm and by  $\text{LaB}_6$  at 808 nm and 1064 nm.

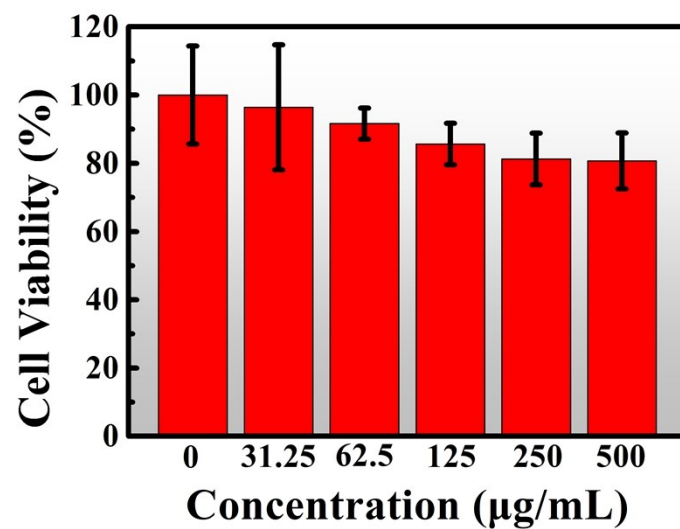

**Fig. S5** Cell viability after incubation with LaB<sub>6</sub> at different concentrations for 24 h.

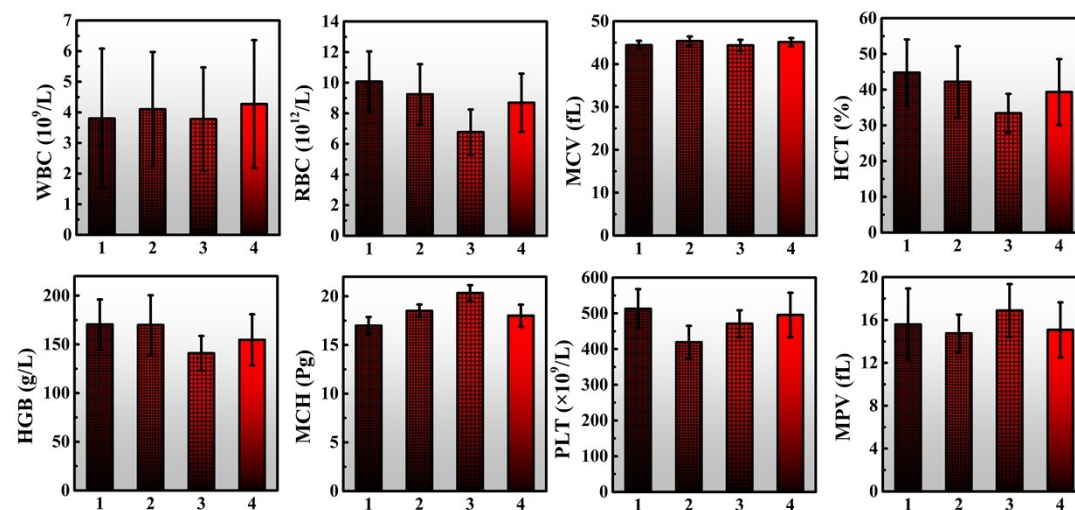

**Fig. S6** Hematological data of the mice in different groups at 14<sup>th</sup> day. (1) Control, (2) NIR, (3) LaB<sub>6</sub>, (4) NIR+LaB<sub>6</sub>.

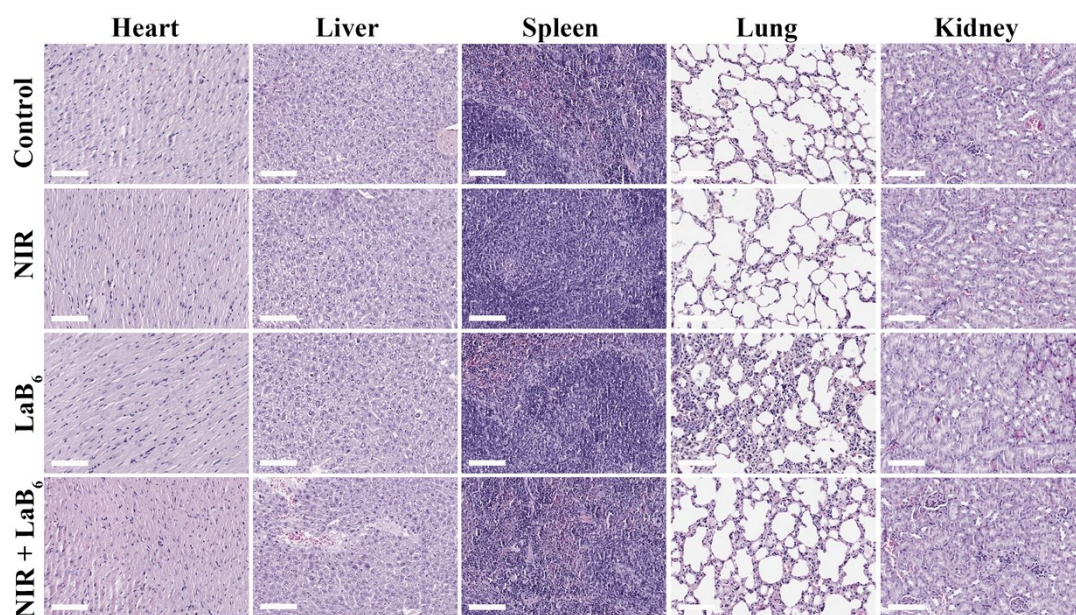

**Fig. S7** H&E staining results of major organs from the mice in different groups.

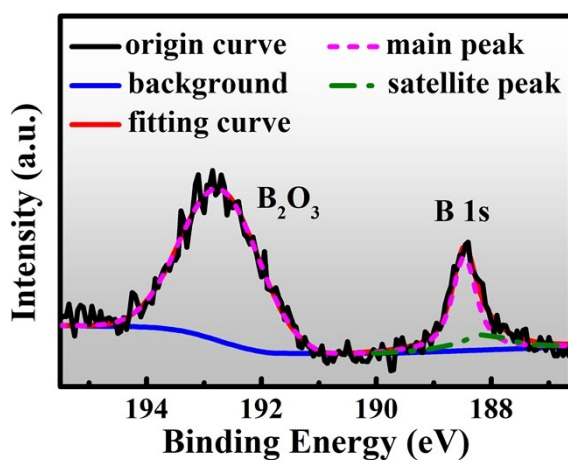

**Fig. S8** High resolution deconvoluted B 1s XPS.

### Calculation of photothermal conversion efficiency<sup>1,2</sup>

The total energy balance for the system could be expressed as Equation S1 according to a well-established method.

$$\sum m_d c_d \frac{dT}{dt} = Q_{LaB_6} + Q_{dis} - Q_{surr} \quad (S1)$$

Herein,  $m_d$  and  $C_d$  are the mass and heat capacity of water,  $T$  is the temperature of LaB<sub>6</sub> aqueous dispersion,  $Q_{LaB6}$  is the energy inputted by LaB<sub>6</sub>,  $Q_{dis}$  is energy inputted by the quartz cell (it was measured independently using a sample cell with water only).  $Q_{surr}$  is heat conduction away from the system.

Obviously, the NIR laser induced  $Q_{LaB6}$  could be calculated as follow:

$$Q_{LaB6} = I(1 - 10^{-A_{880}}) \cdot \eta \quad (S2)$$

Here,  $I$  is the laser power (W),  $A_{880}$  is the optical absorbance of LaB<sub>6</sub> dispersion at 880 nm, and  $\eta$  is the photothermal conversion efficiency we want to obtain.

On the other hand,  $Q_{surr}$  is the thermal energy loss (Equation S3), which linearly increases with temperature difference between system and surrounding.

$$Q_{surr} = hA(T - T_{surr}) \quad (S3)$$

In this equation,  $h$  is heat transfer coefficient,  $A$  is the surface area of the container, and  $T_{surr}$  is the surroundings temperature.

When kept the laser power to be constant, the value ( $Q_{LaB6} + Q_{dis}$ ) is fixed. As the value of  $Q_{surr}$  increases with the increment of  $(T - T_{surr})$ , the system temperature would arrive at a maximum equilibrium temperature eventually when the input and output energies are equal. If we define the  $Q_{LaB6} + Q_{dis}$  as  $Q_{surr-max}$ , we can obtain Equation S4.

$$Q_{LaB6} + Q_{dis} = Q_{surr-max} = hA(T_{max} - T_{surr}) \quad (S4)$$

In Equation S4,  $Q_{surr-max}$  is heat conduction from the surface to air when the sample cell arrive at the maximum equilibrium temperature of  $T_{max}$ .

Then, we can obtain Equation S5 by substituting Equation S2 into Equation S4:

$$\eta = \frac{hA(T_{max} - T_{surr}) - Q_{dis}}{I(1 - 10^{-A_{880}})} \quad (S5)$$

To obtain the  $hA$ , a dimensionless driving force temperature of  $\theta$  is defined with the maximum temperature of  $T_{max}$

$$\theta = \frac{T - T_{surr}}{T_{max} - T_{surr}} \quad (S6)$$

Meanwhile, a time constant  $\tau_s$  was defined as well as

$$\tau_s = \frac{\sum m_d c_d}{hA} \quad (S7)$$

Then, Equation S1 was expressed by S6 and S7 and rearranged into Equation S8.

$$\frac{d\theta}{dt} = \frac{1}{\tau_s} \left[ \frac{Q_{LaB_6} + Q_{dis}}{hA(T_{max} - T_{surr})} - \theta \right] \quad (S8)$$

At the natural cooling stage, no energy was inputted,  $Q_{LaB_6} + Q_{dis} = 0$ , getting the Equation S9

$$dt = -\tau_s \frac{d\theta}{\theta} \quad (S9)$$

Equation S10 was derived from S9 by integration:

$$t = -\tau_s \ln \theta \quad (S10)$$

By plotting the  $t$  versus  $\ln \theta$ , the  $\tau_s$  is determined as 106.53 s (**Fig. 3e**). Then,  $hA$  was calculated as  $0.020 \text{ W} \cdot ^\circ\text{C}^{-1}$  by Equation S7.

$Q_{dis}$  could be worked out in the same way via cell with water only.

$$Q_{dis} = Q_{surr-max-water} = (hA)_{water} (T_{max-water} - T_{surr}) = \frac{m_d c_d (T_{max-water} - T_{surr})}{\tau_{s-water}} \quad (S11)$$

$\tau_{s-water}$  was determined to be 95.35 s (**Fig. S9**),  $(T_{max-water} - T_{surr})$  was  $3.8 \text{ }^\circ\text{C}$ , then  $Q_{dis}$  was calculated to be  $0.084 \text{ W}$ .

Finally, the all the obtained data of  $hA = 0.020 \text{ W} \cdot ^\circ\text{C}^{-1}$ ,  $(T_{max} - T_{surr}) = 24.8^\circ\text{C}$ ,  $I = 1.029 \text{ W}$ ,  $(1 - 10^{-A880}) = 0.953$  were substituted in the Equation S5 and the  $\eta$  was calculated as 41.35%.

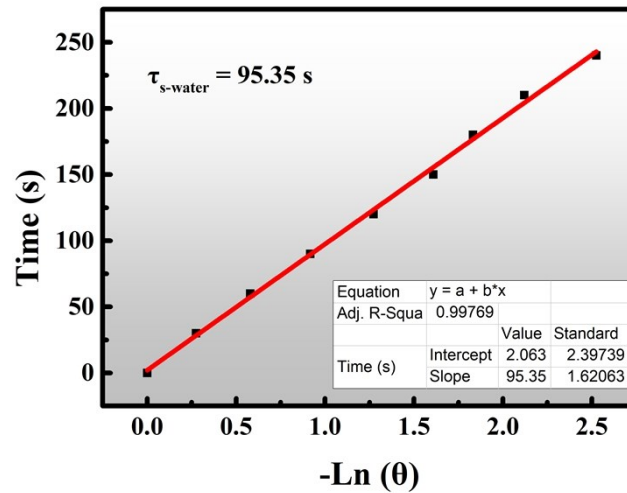

**Fig. S9** The curve of time versus  $-\ln(\theta)$  for water.

## Reference

- [1] D. K. Roper, W. Ahn and M. Hoepfner, *The Journal of Physical Chemistry C*, 2007, **111**, 3636-3641.
- [2] H. Lin, X. Wang, L. Yu, Y. Chen and J. Shi, *Nano Letters*, 2017, **17**, 384-391.
